# Supplementary material for: Modulating the relaxation dynamics via structural transition from a dinuclear dysprosium cluster to a nonanuclear cluster
Source: Royal Society of Chemistry journal article supplement (doi:10.1039/d1dt02380b), 2021-01-01
Supplement: d1dt02380b1.pdf [file d1dt02380b1.pdf]

## Supporting Information

### **Modulating The Relaxation Dynamics Via Structural Transition From Dinuclear Dysprosium Cluster To Nonanuclear Cluster**

*Peng Hu,<sup>a,b</sup> Ling-hui Cao,<sup>b</sup> Ao-gang Liu,<sup>b</sup> Yi-quan Zhang,<sup>\*,c</sup> Tian-le Zhang,<sup>\*,b</sup> Bao Li,<sup>\*,b</sup>*

<sup>a</sup>Hubei Key Laboratory of Radiation Chemistry and Functional Materials, Non-power Nuclear Technology Collaborative Innovation Center, Hubei University of Science and Technology, Xianning, 437100, People's Republic of China.

<sup>b</sup>Key laboratory of Material Chemistry for Energy Conversion and Storage, School of Chemistry and Chemical Engineering, Huazhong University of Science and Technology, Wuhan, 430074, People's Republic of China. Email: libao@hust.edu.cn; tlzhang@hust.edu.cn.

<sup>c</sup>Jiangsu Key Laboratory for NSLSCS, School of Physical Science and Technology, Nanjing Normal University, Nanjing, 210023, People's Republic of China. E-mail: zhangyiquan@njnu.edu.cn

**Table S1** Crystal data and structure refinements for complexes **1** and **2**.

|                                                                               | <b>1</b>                                                                       | <b>2</b>                                                                       |
|-------------------------------------------------------------------------------|--------------------------------------------------------------------------------|--------------------------------------------------------------------------------|
| Chemical formula                                                              | C <sub>20</sub> H <sub>28</sub> Dy <sub>2</sub> N <sub>6</sub> O <sub>20</sub> | C <sub>36</sub> H <sub>68</sub> Dy <sub>9</sub> N <sub>8</sub> O <sub>58</sub> |
| Formula Mass                                                                  | 997.48                                                                         | 3003.48                                                                        |
| Crystal system                                                                | Triclinic                                                                      | Orthorhombic                                                                   |
| <i>a</i> / Å                                                                  | 9.0925(2)                                                                      | 15.328(3)                                                                      |
| <i>b</i> / Å                                                                  | 9.5016(2)                                                                      | 17.913(4)                                                                      |
| <i>c</i> / Å                                                                  | 11.1478(2)                                                                     | 18.551(4)                                                                      |
| <i>α</i> /°                                                                   | 68.381(2)                                                                      | 90                                                                             |
| <i>β</i> /°                                                                   | 82.643(2)                                                                      | 90                                                                             |
| <i>γ</i> /°                                                                   | 67.042(2)                                                                      | 90                                                                             |
| Unit cell volume/Å <sup>3</sup>                                               | 824.29(3)                                                                      | 5093.3(18)                                                                     |
| Temperature/K                                                                 | 294.5(3)                                                                       | 293(2)                                                                         |
| Space group                                                                   | <i>P</i> -1                                                                    | <i>I</i> 222                                                                   |
| <i>Z</i>                                                                      | 1                                                                              | 2                                                                              |
| No. of reflections measured                                                   | 3195                                                                           | 4494                                                                           |
| No. of independent reflections                                                | 3195                                                                           | 4494                                                                           |
| <i>R</i> <sub>int</sub>                                                       | 0.0211                                                                         | 0.0965                                                                         |
| Final <i>R</i> <sub>I</sub> values ( <i>I</i> > 2σ( <i>I</i> ))               | 0.0189                                                                         | 0.0612                                                                         |
| Final <i>wR</i> ( <i>F</i> <sup>2</sup> ) values ( <i>I</i> > 2σ( <i>I</i> )) | 0.0516                                                                         | 0.1661                                                                         |
| Final <i>R</i> <sub>I</sub> values (all data)                                 | 0.0200                                                                         | 0.0614                                                                         |
| Final <i>wR</i> ( <i>F</i> <sup>2</sup> ) values (all data)                   | 0.0521                                                                         | 0.1666                                                                         |
| CCDC                                                                          | 1577365                                                                        | 2085775                                                                        |

<sup>a</sup>*R*<sub>I</sub> =  $\sum ||F_o| - |F_c|| / \sum |F_o|$ . <sup>b</sup>*wR*<sub>2</sub> =  $[\sum w(F_o^2 - F_c^2)^2 / \sum w(F_o^2)^2]^{1/2}$ .

**Table S2** Selected bond lengths (Å) and bond angles (°) for **1**.

| 1 / Å               |                     |                       |                       |
|---------------------|---------------------|-----------------------|-----------------------|
| Dy1-O1 2.5082(19)   | Dy1-O1W 2.3711(19)  | Dy1-O2 2.2583(17)     | Dy1-O2 2.2837(16)     |
| Dy1-O3 2.4945(19)   | Dy1-O4 2.450(2)     | Dy1-O6 2.420(2)       | Dy1-O7 2.512(2)       |
| Dy1-O9 2.444(2)     | Dy1-Dy1 3.8056(3)   |                       |                       |
| 1 / °               |                     |                       |                       |
| O2-Dy1-O1 131.84(6) | O2-Dy1-O1 65.88(6)  | O2-Dy1-O1W 140.01(7)  | O2-Dy1-O1W 145.97(8)  |
| O2-Dy1-O2 66.17(7)  | O2-Dy1-O3 130.66(6) | O2-Dy1-O3 66.51(6)    | O2-Dy1-O4 78.01(7)    |
| O2-Dy1-O4 78.79(7)  | O2-Dy1-O6 124.69(7) | O2-Dy1-O6 117.16(7)   | O2-Dy1-O7 105.75(7)   |
| O2-Dy1-O7 76.87(7)  | O2-Dy1-O9 75.61(7)  | O2-Dy1-O9 101.12(7)   | O2-Dy1-O9 101.12(7)   |
| O4-Dy1-O1 87.39(8)  | O4-Dy1-O3 80.03(8)  | O4-Dy1-O7 151.05(8)   | O6-Dy1-O1 75.34(8)    |
| O6-Dy1-O3 80.11(8)  | O9-Dy1-O1 70.93(7)  | O7-Dy1-Dy1#1 91.61(5) | O9-Dy1-Dy1#1 88.01(5) |

**Table S3** Selected bond lengths (Å) and bond angles (°) for **2**.

| 2 / Å                 |                        |                        |                        |
|-----------------------|------------------------|------------------------|------------------------|
| Dy1-O10 2.384(13)     | Dy1-O11 2.403(13)      | Dy1-O10#1 2.384(13)    | Dy1-O11#1 2.403(13)    |
| Dy2-O1 2.603(14)      | Dy2-O2 2.273(14)       | Dy2-O4 2.307(16)       | Dy2-O6 2.533(2)        |
| Dy2-O10 2.338(12)     | Dy2-O11 2.328(13)      | Dy2-O12 2.527(16)      | Dy2-O14 2.499(17)      |
| Dy2-O15 2.428(18)     | Dy3-O2 2.290(13)       | Dy3-O3 2.675(15)       | Dy3-O4 2.276(15)       |
| Dy3-O5 2.371(15)      | Dy3-O6 2.546(2)        | Dy3-O7 2.562(14)       | Dy3-O8 2.481(17)       |
| Dy3-O10 2.331(13)     | Dy3-O11 2.320(11)      | Dy1-Dy2 3.7645(9)      | Dy2-Dy3 3.5208(13)     |
| 2 / °                 |                        |                        |                        |
| O10-Dy1-O11 72.7(4)   | O10-Dy1-O11#1 80.8(4)  | O10-Dy1-O11#2 71.9(4)  | O10-Dy1-O11#3 140.1(4) |
| O10-Dy1-O10#1 78.9(6) | O10-Dy1-O10#2 111.8(6) | O10-Dy1-O10#3 145.2(6) | O2-Dy2-O12 121.6(5)    |
| O2-Dy2-O14 83.3(6)    | O2-Dy2-O15 145.4(5)    | O10-Dy2-O14 88.5(5)    | O11-Dy2-Dy3 95.6(3)    |
| O11-Dy2-O1 151.8(5)   | O12-Dy2-O1 116.5(5)    | O12-Dy2-O6 131.8(5)    | O15-Dy2-O1 82.6(6)     |
| O2-Dy3-O5 138.4(5)    | O2-Dy3-O6 67.6(4)      | O4-Dy3-O6 67.6(5)      | O4-Dy3-O7 132.3(7)     |
| O5-Dy3-O3 76.2(6) -   | O5-Dy3-O6 139.3(4)     | O8-Dy3-O6 139.2(4)     | O8-Dy3-O7 51.8(5)      |
| O10-Dy3-O5 141.2(5)   | O10-Dy3-O6 66.0(4)     | O11-Dy3-O3 154.7(5)    | O11-Dy3-O5 89.3(5)     |

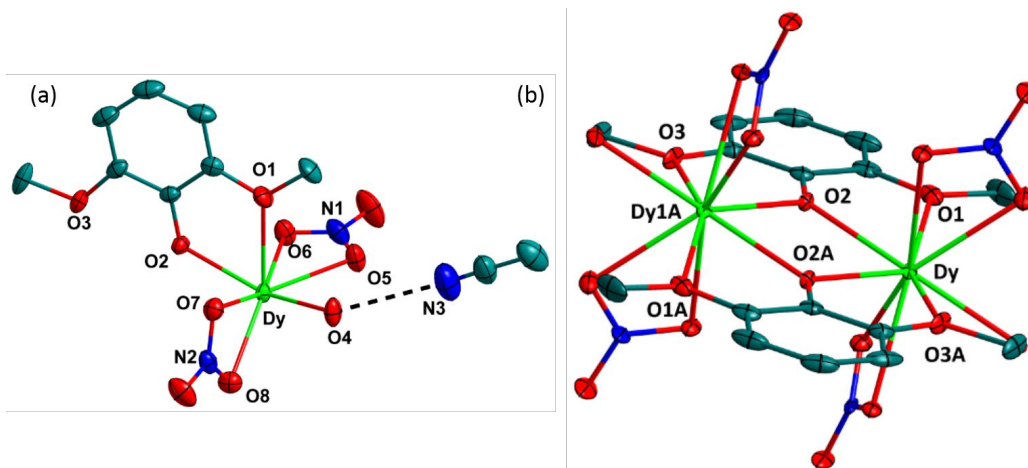

**Figure S1.** (a) Perspective view of the asymmetric unit of compound **1** with acetonitrile molecules; (b) ORTEP representation of **1** with the thermal ellipsoids at 30% probability. Hydrogen atoms are omitted for clarity. Color code: Dy, bright green; O, red; N, blue; C, teal.

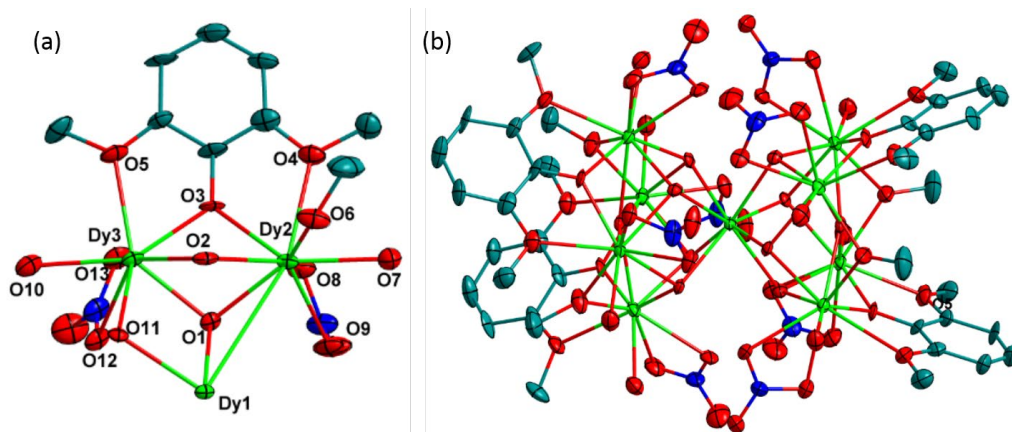

**Figure S2.** (a) Perspective view of the asymmetric unit of compound **2** with methanol molecules; (b) ORTEP representation of **2** with the thermal ellipsoids at 30% probability. Hydrogen atoms are omitted for clarity. Color code: Dy, bright green; O, red; N, blue; C, teal.

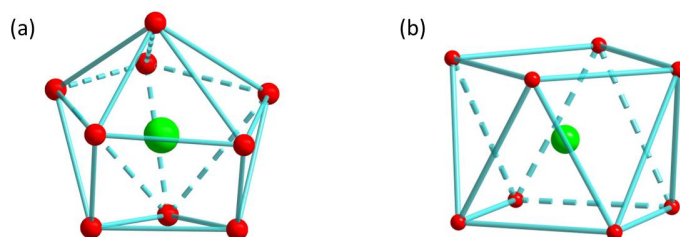

**Figure S3.** (a) The coordination geometry of Dy<sup>III</sup> ion in compound **1**; (b) The coordination geometry of Dy<sup>III</sup>(1) ion in compound **2**. Color code: Dy, bright green; O, red.

**Table S4** The evaluated local coordination geometry analysis for Dy<sup>III</sup> ion in compound **1** by

SHAPE software.

| <b>Label</b>   | <b>Shape</b>                 | <b>Symmetry</b>                          | <b>Distortion(°)</b> |
|----------------|------------------------------|------------------------------------------|----------------------|
| EP-9           | <i>D</i> <sub>9h</sub>       | Enneagon                                 | 34.475               |
| OPY-9          | <i>C</i> <sub>8v</sub>       | Octagonal pyramid                        | 23.361               |
| HBPY-9         | <i>D</i> <sub>7h</sub>       | Heptagonal bipyramid                     | 17.623               |
| JTC-9          | <i>C</i> <sub>3v</sub>       | Johnson triangular cupola J3             | 15.068               |
| JCCU-9         | <i>C</i> <sub>4v</sub>       | Capped cube J8                           | 9.473                |
| CCU-9          | <i>C</i> <sub>4v</sub>       | Spherical-relaxed capped cube            | 9.110                |
| JCSAPR-9       | <i>C</i> <sub>4v</sub>       | Capped square antiprism J10              | 1.833                |
| <b>CSAPR-9</b> | <b><i>C</i><sub>4v</sub></b> | <b>Spherical capped square antiprism</b> | <b>1.281</b>         |
| JTCTPR-9       | <i>D</i> <sub>3h</sub>       | Tricapped trigonal prism J51             | 2.457                |
| TCTPR-9        | <i>D</i> <sub>3h</sub>       | Spherical tricapped trigonal prism       | 2.424                |
| JTDIC-9        | <i>C</i> <sub>3v</sub>       | Tridiminished icosahedron J63            | 11.348               |
| HH-9           | <i>C</i> <sub>2v</sub>       | Hula-hoop                                | 11.384               |
| MFF-9          | <i>C</i> <sub>s</sub>        | Muffin                                   | 1.714                |

**Table S5** The evaluated local coordination geometry analysis for Dy<sup>III</sup>(1) ion in compound **2** by

SHAPE software.

| <b>Label</b>  | <b>Shape</b>                 | <b>Symmetry</b>                            | <b>Distortion(°)</b> |
|---------------|------------------------------|--------------------------------------------|----------------------|
| OP-8          | <i>D</i> <sub>8h</sub>       | Octagon                                    | 30.509               |
| HPY-8         | <i>C</i> <sub>7v</sub>       | Heptagonal pyramid                         | 23.602               |
| HBPY-8        | <i>D</i> <sub>6h</sub>       | Hexagonal bipyramid                        | 16.148               |
| CU-8          | <i>O</i> <sub>h</sub>        | Cube                                       | 8.836                |
| <b>SAPR-8</b> | <b><i>D</i><sub>4d</sub></b> | <b>Square antiprism</b>                    | <b>0.304</b>         |
| TDD-8         | <i>D</i> <sub>2d</sub>       | Triangular dodecahedron                    | 2.341                |
| JGBF-8        | <i>D</i> <sub>2d</sub>       | Johnson gyrobifastigium J26                | 16.498               |
| JETBPY-8      | <i>D</i> <sub>3h</sub>       | Johnson elongated triangular bipyramid J14 | 29.363               |

|         |          |                                |        |
|---------|----------|--------------------------------|--------|
| JBTPR-8 | $C_{2v}$ | Biaugmented trigonal prism J50 | 2.903  |
| BTPR-8  | $C_{2v}$ | Biaugmented trigonal prism     | 2.366  |
| JSD-8   | $D_{2d}$ | Snub diphendoid J84            | 5.294  |
| TT-8    | $T_d$    | Triakis tetrahedron            | 9.705  |
| ETBPY-8 | $D_{3h}$ | Elongated trigonal bipyramid   | 24.997 |

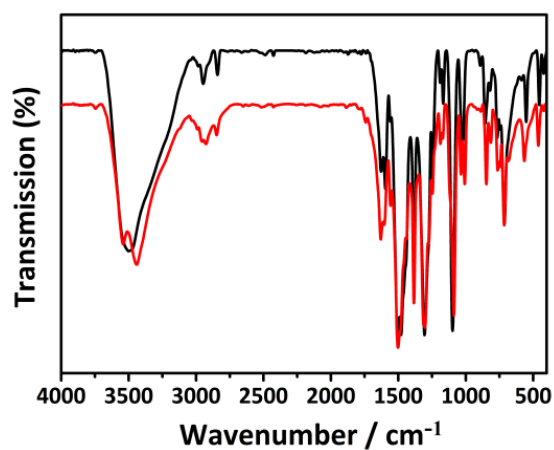

Figure S4. FT-IR spectra of compounds 1 (black) and 2 (red).

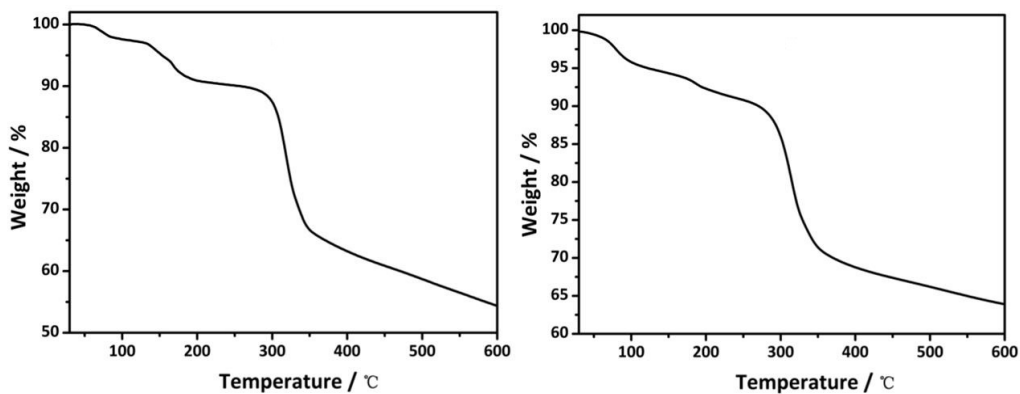

Figure S5. TG curves of compounds 1 (left) and 2 (right).

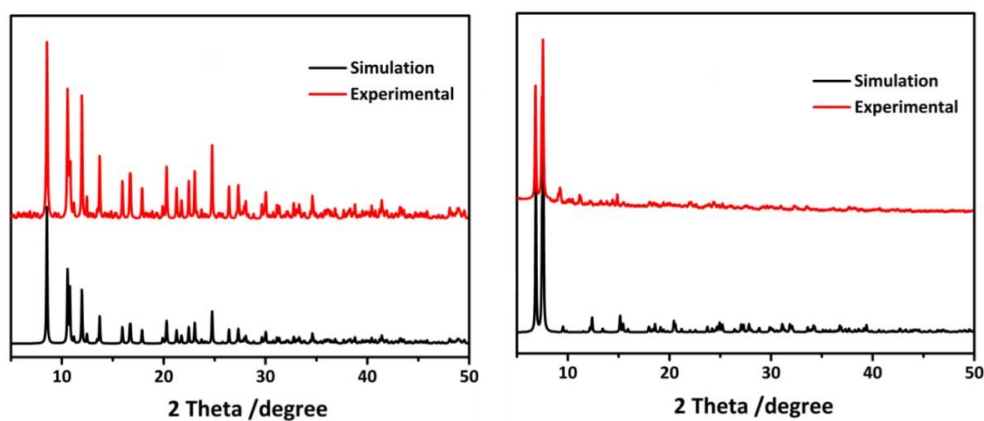

**Figure S6.** The simulated X-ray powder diffraction patterns (black) and the experimental ones (red) of compounds **1** (left) and **2** (right). The experimental PXRD patterns are primarily consistent with the the corresponding simulated ones, highlighting the phase purity of the four complexes. Minor inconsistencies in the intensity and shape of the peaks were observed between the experimental and simulation data due to the different orientations of the crystal samples.

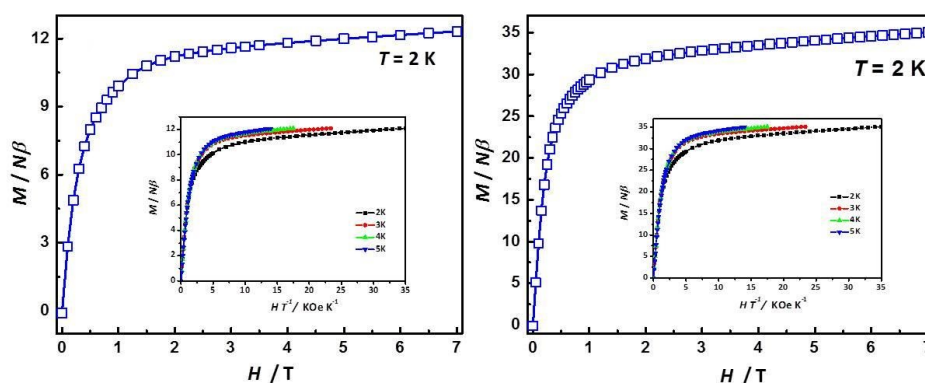

**Figure S7.** Magnetization curve for compounds **1** (left) and **2** (right) at 2 K. Inset:  $M$  vs.  $H/T$  plots at different temperatures (2 K, 3 K, 4 K and 5 K).

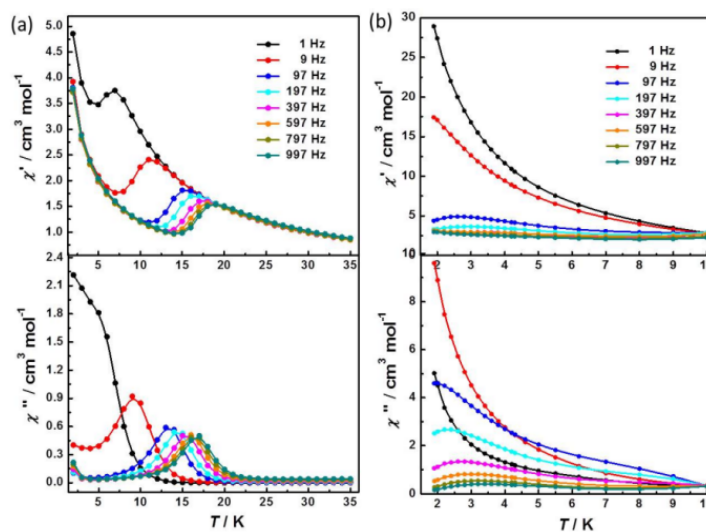

**Figure S8.** Temperature dependence of the in-phase ( $\chi'$ ) and out-of-phase ( $\chi''$ ) ac susceptibilities of **1** (a) and **2** (b) under zero dc field.

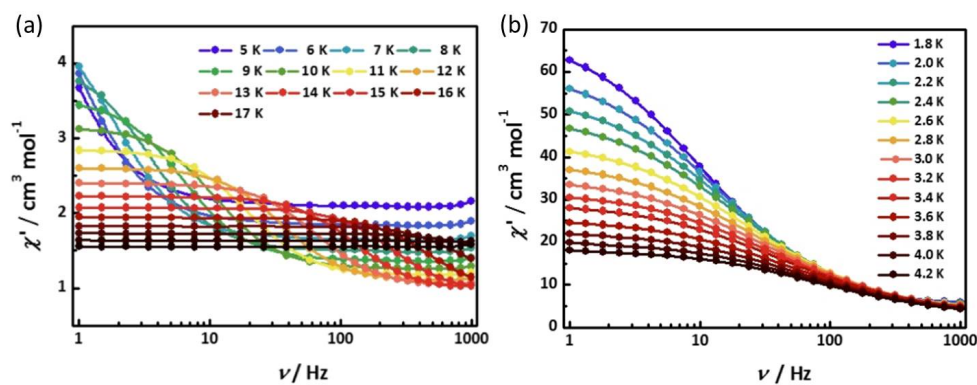

**Figure S9.** Frequency dependence of the in-phase ( $\chi'$ ) ac susceptibilities of **1** (a) and **2** (b) under zero dc field.

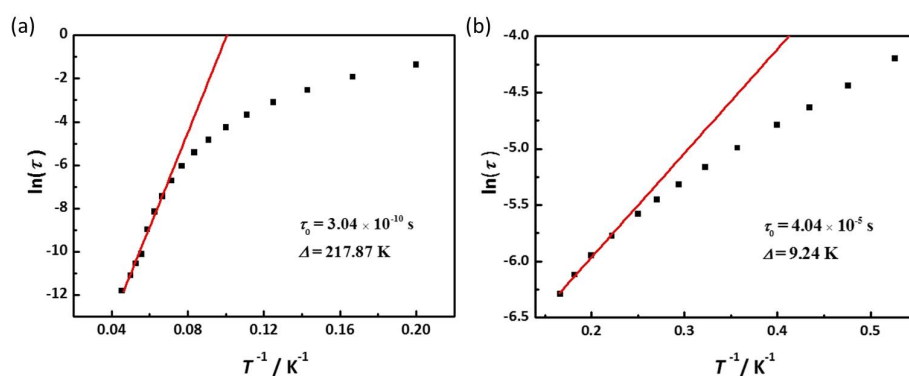

**Figure S10.** Arrhenius plots of relaxation time data for **1** (a) and **2** (b). Solid red lines correspond to the best fits in the high-temperature regime.

**Table S6.** The parameters obtained by fitting Cole-Cole plot under zero dc field for **1**.

| T (K) | $\chi^S$ | $\chi^T$ | $\tau$   | $\alpha$ |
|-------|----------|----------|----------|----------|
| 5     | 2.10     | 6.92     | 0.26     | 0.10     |
| 6     | 1.84     | 5.56     | 0.15     | 0.077    |
| 7     | 1.65     | 4.63     | 0.080    | 0.053    |
| 8     | 1.37     | 4.00     | 0.045    | 0.042    |
| 9     | 1.26     | 3.52     | 0.025    | 0.035    |
| 10    | 1.17     | 3.15     | 0.014    | 0.031    |
| 11    | 1.09     | 2.86     | 0.80E-02 | 0.033    |
| 12    | 1.02     | 2.61     | 0.44E-02 | 0.032    |
| 13    | 0.95     | 2.41     | 0.24E-02 | 0.034    |



|    |          |      |          |          |
|----|----------|------|----------|----------|
| 14 | 0.88     | 2.23 | 0.12E-02 | 0.036    |
| 15 | 0.81     | 2.08 | 0.59E-03 | 0.038    |
| 16 | 0.65     | 1.95 | 0.29E-03 | 0.039    |
| 17 | 0.027    | 1.83 | 0.13E-03 | 0.047    |
| 18 | 0.087    | 1.73 | 0.40E-04 | 0.062    |
| 19 | 0.12E-12 | 1.64 | 0.27E-04 | 0.79E-15 |
| 20 | 0.17E-12 | 1.56 | 0.15E-04 | 0.21E-14 |

**Table S7.** The parameters obtained by fitting Cole-Cole plot under zero dc field for **2**.

| T (K) | $\chi^s$ | $\chi^T$ | $\tau$ | $\alpha$ |
|-------|----------|----------|--------|----------|
| 1.8   | 3.97     | 70.0     | 0.015  | 0.32     |
| 2.0   | 3.60     | 61.8     | 0.012  | 0.33     |
| 2.2   | 3.33     | 55.6     | 0.0097 | 0.34     |
| 2.4   | 3.14     | 50.8     | 0.0083 | 0.35     |
| 2.6   | 2.90     | 44.6     | 0.0068 | 0.36     |
| 2.8   | 2.75     | 39.8     | 0.0057 | 0.37     |
| 3.0   | 2.62     | 35.8     | 0.0049 | 0.38     |
| 3.3   | 2.53     | 32.6     | 0.0043 | 0.38     |
| 3.6   | 2.45     | 29.8     | 0.0038 | 0.39     |
| 4.0   | 2.33     | 26.0     | 0.0031 | 0.39     |
| 4.5   | 2.24     | 23.0     | 0.0026 | 0.39     |
| 5.0   | 2.16     | 20.6     | 0.0022 | 0.38     |

## Computational details

Complex **1** has one type of Dy<sup>III</sup>, and **2** has two types of Dy<sup>III</sup>, thus one and two Dy<sup>III</sup> fragments for **1** and **2** were calculated, respectively. Complete-active-space self-consistent field (CASSCF) calculations on individual lanthanide Dy<sup>III</sup> fragments of model structures (see Figure S11 for the calculated model structures of **1**, **2\_a**, **2\_b**).

The complete structures of the two complexes extracted from the compounds on the basis of single-crystal X-ray determined geometries have been carried out with MOLCAS 8.2 program package.<sup>S1</sup> Central Dy<sup>III</sup> fragment was calculated keeping the experimentally determined structure of the corresponding compound while replacing the other Dy<sup>III</sup> ions by diamagnetic Lu<sup>III</sup>. In the calculation of the other type of Dy<sup>III</sup> fragment, the influence of the central Dy<sup>III</sup> ion was taken into account by the closed-shell Lu<sup>III</sup> *ab initio* embedding model potentials (AIMP; La.ECP.deGraaf.0s.0s.0e-La-(LaMnO3).)<sup>S2</sup>

The basis sets for all atoms are atomic natural orbitals from the MOLCAS ANO-RCC library: ANO-RCC-VTZP for Dy<sup>III</sup> ion; VTZ for close O; VDZ for distant atoms. The calculations employed the second order Douglas-Kroll-Hess Hamiltonian, where scalar relativistic contractions were taken into account in the basis set and the spin-orbit couplings were handled separately in the restricted active space state interaction (RASSI-SO) procedure. For the fragment of individual Dy<sup>III</sup> ion, active electrons in 7 active orbitals include all *f* electrons (CAS (9 in 7)) in the CASSCF calculation. To exclude all the doubts, we calculated all the roots in the active space. We have mixed the maximum number of spin-free state which was possible with our hardware (all from 21 sextets, 128 from 224 quadruplets, 130 from 490 doublets). And then, Single\_Aniso<sup>S3</sup> program was used to obtain the *g* tensors, energy levels, magnetic axes, *et al.*, based on the above CASSCF/RASSI calculations.

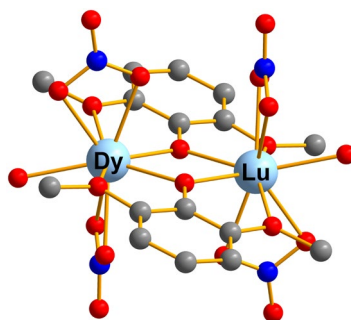

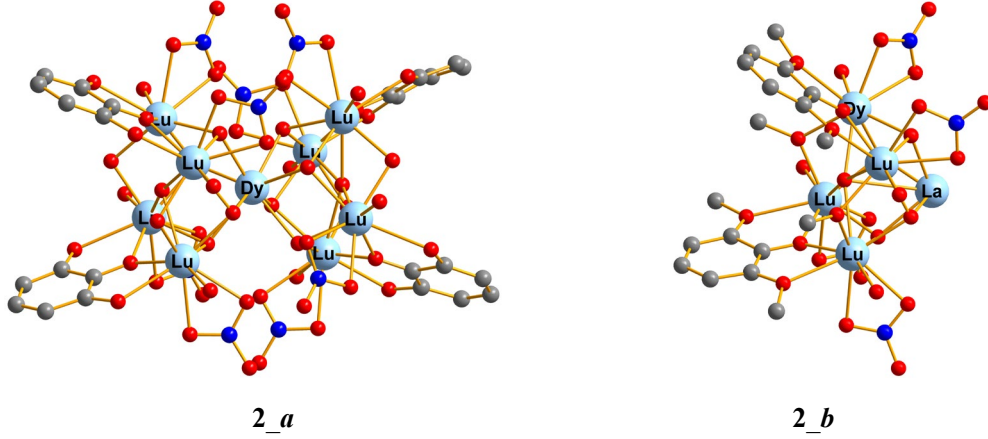

**Figure S11.** Calculated model structures of **1**, **2\_a**, **2\_b**; H atoms are omitted.

To fit the exchange interaction in complexes **1** and **2**, we took two steps to obtain them. Firstly, we calculated individual Dy<sup>III</sup> fragments using CASSCF to obtain the corresponding magnetic properties. Then, the exchange interaction between the magnetic centers is considered within the Lines model,<sup>S4</sup> while the account of the dipole-dipole magnetic coupling is treated exactly. The Lines model is effective and has been successfully used widely in the research field of f-element single-molecule magnets.<sup>S5</sup>

For complex **1**, there is only one type of  $J$ .

The exchange Hamiltonian is:

$$\hat{H}_{exch} = -J \hat{S}_{Dy1} \hat{S}_{Dy1'} \quad (S1)$$

For complex **2**, there are twenty types of  $J$ .

The exchange Hamiltonian is:

$$\begin{aligned} \hat{H}_{exch} = & -J_1 \hat{S}_{Dy1} \hat{S}_{Dy2} - J_2 \hat{S}_{Dy1} \hat{S}_{Dy3} - J_3 \hat{S}_{Dy1} \hat{S}_{Dy4} \\ & -J_4 \hat{S}_{Dy1} \hat{S}_{Dy5} - J_5 \hat{S}_{Dy1} \hat{S}_{Dy6} - J_6 \hat{S}_{Dy1} \hat{S}_{Dy7} - J_7 \hat{S}_{Dy1} \hat{S}_{Dy8} \\ & -J_8 \hat{S}_{Dy1} \hat{S}_{Dy9} - J_9 \hat{S}_{Dy2} \hat{S}_{Dy3} - J_{10} \hat{S}_{Dy3} \hat{S}_{Dy4} - J_{11} \hat{S}_{Dy4} \hat{S}_{Dy5} \\ & -J_{12} \hat{S}_{Dy2} \hat{S}_{Dy5} - J_{13} \hat{S}_{Dy2} \hat{S}_{Dy4} - J_{14} \hat{S}_{Dy3} \hat{S}_{Dy5} - J_{15} \hat{S}_{Dy6} \hat{S}_{Dy7} \\ & -J_{16} \hat{S}_{Dy7} \hat{S}_{Dy8} - J_{17} \hat{S}_{Dy8} \hat{S}_{Dy9} - J_{18} \hat{S}_{Dy6} \hat{S}_{Dy9} - J_{19} \hat{S}_{Dy6} \hat{S}_{Dy8} \\ & -J_{20} \hat{S}_{Dy7} \hat{S}_{Dy9} \end{aligned} \quad (S2)$$

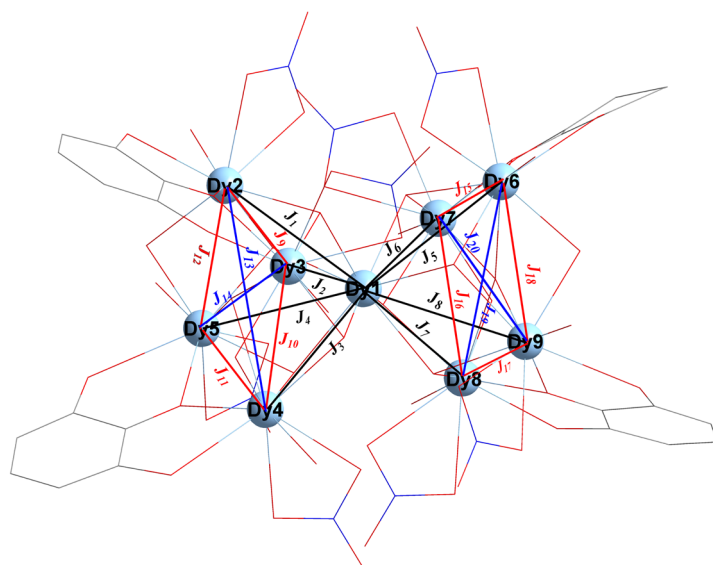

**Figure S12.** Labeled Dy-Dy interactions in complex **2**.

$\tilde{J} = 25 \cos \varphi J$ , where  $\varphi$  is the angle between the anisotropy axes on two Dy<sup>III</sup> sites, and  $J$  is the Lines exchange coupling parameter. The  $\tilde{J}_{total}$  is the parameter of the total magnetic interaction ( $\tilde{J}_{total} = \tilde{J}_{dip} + \tilde{J}_{exch}$ ) between magnetic center ions.  $\hat{S}_{Dy} = \pm 1/2$  is the ground pseudospin on the Dy<sup>III</sup> site. The dipolar magnetic coupling can be calculated exactly, while the exchange coupling constants were fitted through comparison of the computed and measured magnetic susceptibilities.

**Table S8.** Calculated energy levels ( $\text{cm}^{-1}$ ),  $\mathbf{g}$  ( $g_x, g_y, g_z$ ) tensors and  $m_J$  values of the lowest Kramers doublets (KDs) of individual Dy<sup>III</sup> fragments of **1**, **2\_a** and **2\_b**.

| <b>1</b> |                    |              |        | <b>2_a</b> |                    |              |        | <b>2_b</b> |                    |              |        |            |
|----------|--------------------|--------------|--------|------------|--------------------|--------------|--------|------------|--------------------|--------------|--------|------------|
| KDs      | $E/\text{cm}^{-1}$ | $\mathbf{g}$ |        | $m_J$      | $E/\text{cm}^{-1}$ | $\mathbf{g}$ |        | $m_J$      | $E/\text{cm}^{-1}$ | $\mathbf{g}$ |        | $m_J$      |
| 1        | 0.0                | $g_x$        | 0.172  | $\pm 15/2$ | 0.0                | $g_x$        | 0.154  | $\pm 15/2$ | 0.0                | $g_x$        | 0.183  | $\pm 15/2$ |
|          |                    | $g_y$        | 0.517  |            |                    | $g_y$        | 0.344  |            |                    | $g_y$        | 0.589  |            |
|          |                    | $g_z$        | 19.061 |            |                    | $g_z$        | 19.574 |            |                    | $g_z$        | 18.818 |            |
| 2        | 42.6               | $g_x$        | 0.127  | $\pm 5/2$  | 72.0               | $g_x$        | 10.715 | $\pm 13/2$ | 40.0               | $g_x$        | 0.974  | $\pm 13/2$ |
|          |                    | $g_y$        | 0.403  |            |                    | $g_y$        | 8.167  |            |                    | $g_y$        | 1.339  |            |
|          |                    | $g_z$        | 18.234 |            |                    | $g_z$        | 2.677  |            |                    | $g_z$        | 17.843 |            |
| 3        | 126.5              | $g_x$        | 0.399  | $\pm 9/2$  | 90.7               | $g_x$        | 7.108  | $\pm 7/2$  | 85.5               | $g_x$        | 2.051  | $\pm 9/2$  |
|          |                    | $g_y$        | 0.820  |            |                    | $g_y$        | 5.828  |            |                    | $g_y$        | 4.197  |            |
|          |                    | $g_z$        | 16.669 |            |                    | $g_z$        | 3.426  |            |                    | $g_z$        | 13.332 |            |
| 4        | 159.5              | $g_x$        | 1.639  | $\pm 13/2$ | 107.7              | $g_x$        | 9.227  | $\pm 11/2$ | 150.2              | $g_x$        | 8.131  | $\pm 7/2$  |
|          |                    | $g_y$        | 3.479  |            |                    | $g_y$        | 7.315  |            |                    | $g_y$        | 7.562  |            |
|          |                    | $g_z$        | 15.213 |            |                    | $g_z$        | 2.747  |            |                    | $g_z$        | 2.112  |            |

|   |       |       |        |            |       |       |        |           |       |       |        |            |
|---|-------|-------|--------|------------|-------|-------|--------|-----------|-------|-------|--------|------------|
| 5 | 179.7 | $g_x$ | 0.026  | $\pm 7/2$  | 137.8 | $g_x$ | 1.716  | $\pm 9/2$ | 246.0 | $g_x$ | 0.408  | $\pm 3/2$  |
|   |       | $g_y$ | 5.041  |            |       | $g_y$ | 3.859  |           |       | $g_y$ | 4.389  |            |
|   |       | $g_z$ | 11.201 |            |       | $g_z$ | 9.191  |           |       | $g_z$ | 10.011 |            |
| 6 | 217.3 | $g_x$ | 2.135  | $\pm 11/2$ | 156.8 | $g_x$ | 1.760  | $\pm 5/2$ | 322.0 | $g_x$ | 1.610  | $\pm 11/2$ |
|   |       | $g_y$ | 4.462  |            |       | $g_y$ | 3.931  |           |       | $g_y$ | 2.092  |            |
|   |       | $g_z$ | 13.109 |            |       | $g_z$ | 10.887 |           |       | $g_z$ | 13.858 |            |
| 7 | 268.3 | $g_x$ | 1.147  | $\pm 3/2$  | 230.8 | $g_x$ | 0.028  | $\pm 3/2$ | 421.5 | $g_x$ | 0.571  | $\pm 1/2$  |
|   |       | $g_y$ | 1.630  |            |       | $g_y$ | 0.039  |           |       | $g_y$ | 0.651  |            |
|   |       | $g_z$ | 14.361 |            |       | $g_z$ | 16.980 |           |       | $g_z$ | 16.548 |            |
| 8 | 355.9 | $g_x$ | 0.199  | $\pm 1/2$  | 674.1 | $g_x$ | 0.000  | $\pm 1/2$ | 492.4 | $g_x$ | 0.129  | $\pm 5/2$  |
|   |       | $g_y$ | 0.565  |            |       | $g_y$ | 0.000  |           |       | $g_y$ | 0.291  |            |
|   |       | $g_z$ | 18.564 |            |       | $g_z$ | 19.856 |           |       | $g_z$ | 19.355 |            |

**Table S9.** Fitted exchange coupling constant  $J_{\text{exch}}$ , the calculated dipole-dipole interaction  $J_{\text{dip}}$  and the total  $J$  between  $\text{Dy}^{\text{III}}$  ions in **1–2**. The intermolecular interactions  $zJ'$  of **1–2** were both fit to  $0.00 \text{ cm}^{-1}$ .

|          | <b>1</b>         |                   |                    | <b>2</b>         |                   |                    |
|----------|------------------|-------------------|--------------------|------------------|-------------------|--------------------|
|          | $J_{\text{dip}}$ | $J_{\text{exch}}$ | $J_{\text{total}}$ | $J_{\text{dip}}$ | $J_{\text{exch}}$ | $J_{\text{total}}$ |
| $J_1$    | 1.95             | 3.50              | 5.45               | -0.49            | 1.50              | 1.01               |
| $J_2$    |                  |                   |                    | 0.01             | 1.50              | 1.51               |
| $J_3$    |                  |                   |                    | -0.72            | 1.50              | 0.78               |
| $J_4$    |                  |                   |                    | -0.66            | 1.50              | 0.84               |
| $J_5$    |                  |                   |                    | -0.95            | 1.50              | 0.55               |
| $J_6$    |                  |                   |                    | -1.35            | 1.50              | 0.15               |
| $J_7$    |                  |                   |                    | -0.34            | 1.50              | 0.16               |
| $J_8$    |                  |                   |                    | -1.38            | 1.50              | 0.12               |
| $J_9$    |                  |                   |                    | -4.44            | 0.75              | -3.69              |
| $J_{10}$ |                  |                   |                    | 5.23             | 0.75              | 5.98               |
| $J_{11}$ |                  |                   |                    | -4.25            | 0.75              | -3.50              |
| $J_{12}$ |                  |                   |                    | 5.68             | 0.75              | 6.43               |
| $J_{13}$ |                  |                   |                    | 2.18             | 0.75              | 2.93               |
| $J_{14}$ |                  |                   |                    | 2.25             | 0.75              | 3.00               |
| $J_{15}$ |                  |                   |                    | -3.73            | 0.75              | -2.98              |
| $J_{16}$ |                  |                   |                    | 5.27             | 0.75              | 6.02               |
| $J_{17}$ |                  |                   |                    | -3.82            | 0.75              | -3.07              |
| $J_{18}$ |                  |                   |                    | 5.59             | 0.75              | 6.34               |
| $J_{19}$ |                  |                   |                    | 2.23             | 0.75              | 2.98               |
| $J_{20}$ |                  |                   |                    | 1.68             | 0.75              | 2.43               |

**Table S10.** Exchange energies ( $\text{cm}^{-1}$ ) and main values of the  $g_z$  for the lowest two exchange doublets of complex **1** and the lowest eight exchange doublets of complex **2**.

|   | <b>1</b>           |        | <b>2</b>           |         |
|---|--------------------|--------|--------------------|---------|
|   | $E/\text{cm}^{-1}$ | $g_z$  | $E/\text{cm}^{-1}$ | $g_z$   |
| 1 | 0.000              | 38.120 | 0.0                | 159.721 |
|   | 0.001              |        |                    |         |
| 2 | 3.030              | 0.000  | 0.7                | 20.531  |
|   | 3.031              |        |                    |         |
| 3 |                    |        | 1.0                | 56.490  |
| 4 |                    |        | 1.2                | 93.812  |
| 5 |                    |        | 1.3                | 56.368  |
| 6 |                    |        | 1.5                | 93.721  |
| 7 |                    |        | 1.7                | 110.221 |
| 8 |                    |        | 1.9                | 63.118  |

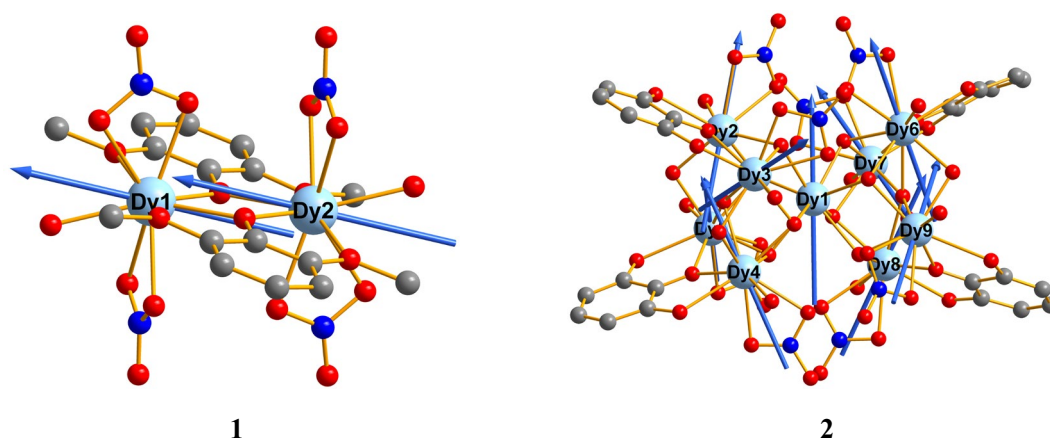

**Figure S13.** Calculated orientations of the local main magnetic axes of the ground Kramers (light blue) doublet on  $\text{Dy}^{\text{III}}$  ions of complexes **1** and **2**.

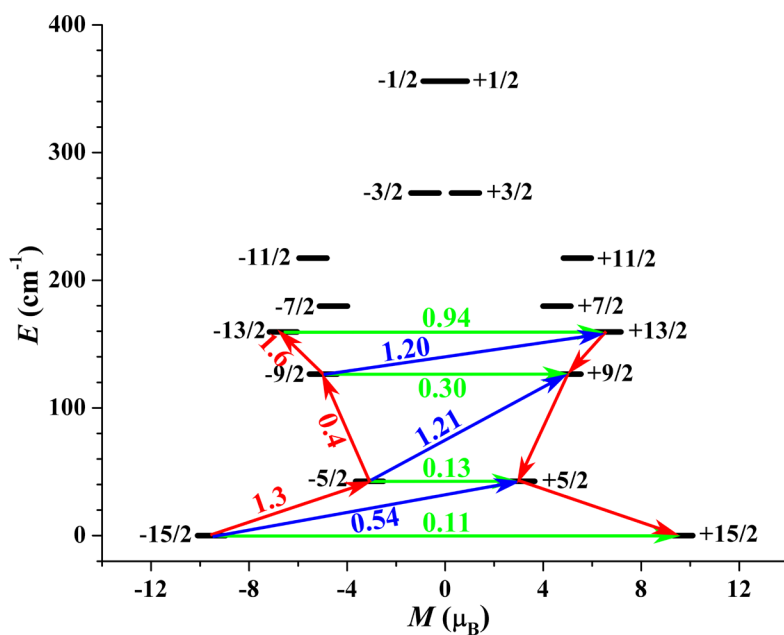

**Figure S14.** The magnetization blocking barriers for individual Dy<sup>III</sup> fragments of **1**. The thick black lines represent the Kramers doublets as a function of their magnetic moment along the magnetic axis. The green lines correspond to diagonal quantum tunneling of magnetization (QTM); the blue line represent off-diagonal relaxation process. The numbers at each arrow stand for the mean absolute value of the corresponding matrix element of transition magnetic moment.

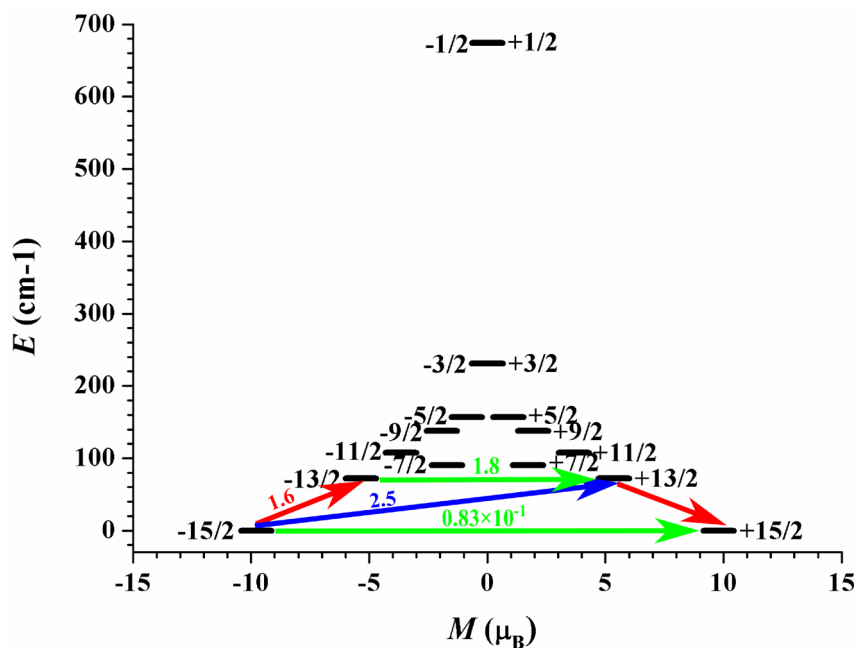

**Figure S15.** The magnetization blocking barriers for individual Dy<sup>III</sup> fragments of **2\_a**. The thick black lines represent the Kramers doublets as a function of their magnetic moment along the magnetic axis. The green lines correspond to diagonal quantum tunneling of magnetization (QTM); the blue line represent off-diagonal relaxation process. The numbers at each arrow stand for the mean absolute value of the corresponding matrix element of transition magnetic moment.

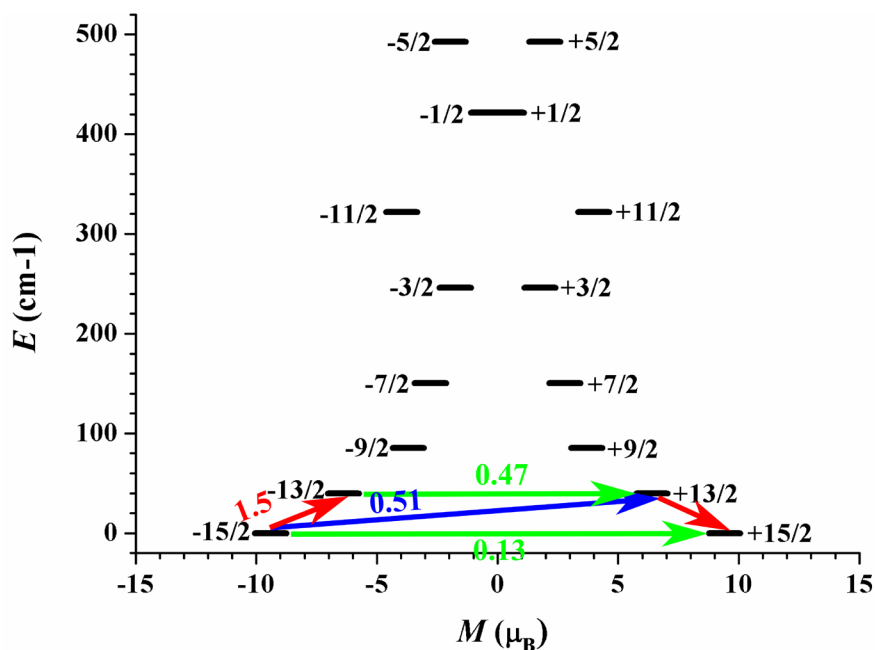

**Figure S16.** The magnetization blocking barriers for individual Dy<sup>III</sup> fragments of **2\_b**. The thick black lines represent the Kramers doublets as a function of their magnetic moment along the magnetic axis. The green lines correspond to diagonal quantum tunneling of magnetization (QTM); the blue line represent off-diagonal relaxation process. The numbers at each arrow stand for the mean absolute value of the corresponding matrix element of transition magnetic moment.

## References:

- [1] (a) Aquilante, F.; De Vico, L.; Ferré, N.; Ghigo, G.; Malmqvist, P.-A.; Neogrády, P.; Pedersen, T. B.; Pitonak, M.; Reiher, M.; Roos, B. O.; Serrano-Andrés, L.; Urban, M.; Veryazov, V.; Lindh, R. *J. Comput. Chem.*, 2010, **31**, 224; (b) Veryazov, V.; Widmark, P. -O.; Serrano-Andres, L.; Lindh, R.; Roos, B. O. *Int. J. Quantum Chem.*, 2004, **100**, 626; (c) Karlström, G.; Lindh, R.; Malmqvist, P. -Å.; Roos, B. O.; Ryde, U.; Veryazov, V.; Widmark, P. -O.; Cossi, M.; Schimmelpfennig, B.; Neogr'ady, P.; Seijo, L. *Comput. Mater. Sci.*, 2003, **28**, 222–239.
- [2] Seijo, L.; Barandiarán, Z. *Computational Chemistry: Reviews of Current Trends*; World Scientific, Inc.: Singapore, 1999.
- [3] (a) Chibotaru, L. F.; Ungur, L.; Soncini, A. *Angew. Chem. Int. Ed.*, 2008, **47**, 4126; (b) Ungur, L.; Van den Heuvel, W.; Chibotaru, L. F. *New J. Chem.*, 2009, **33**, 1224; (c) Chibotaru, L. F.; Ungur, L.; Aronica, C.; Elmoll, H.; Pilet, G.; Luneau, D. *J. Am. Chem. Soc.*, 2008, **130**, 12445.
- [4] Lines, M. E. *J. Chem. Phys.* 1971, **55**, 2977.



[5] (a) Mondal, K. C.; Sundt, A.; Lan, Y. H.; Kostakis, G. E.; Waldmann, O.; Ungur, L.; Chibotaru, L. F.; Anson, C. E.; Powell, A. K. *Angew. Chem. Int. Ed.* 2012, **51**, 7550; (b) Langley, S. K.; Wielechowski, D. P.; Vieru, V.; Chilton, N. F.; Moubaraki, B.; Abrahams, B. F.; Chibotaru, L. F.; Murray, K. S. *Angew. Chem. Int. Ed.* 2013, **52**, 12014.
